# Supplementary material for: Identification and Functional Characterization of the Fatp1 Gene from Mud Crab, Scylla paramamosain
Source: Preprints.org preprint supplement (doi:10.20944/preprints202409.0378.v1), 2024-09-05
Supplement: Supplementary file 1 [file supplementary]

**Table S1.** Ingredients and proximate composition of the experimental diets (dry matter basis)

|  | Dietary n-3 HUFA levels (% dry weight) | | | | |
| --- | --- | --- | --- | --- | --- |
| 0.05 (0.50) | 0.73 (1.04) | 1.04 (2.57) | 1.42 | 2.57 |
| *Ingredients* | | | |  |  |
| Vegetable oil mixture 1 | 10.00 | 10.00 | 10.00 | 10.00 | 10.00 |
| Fish oil | 5.00 | 5.00 | 5.00 | 5.00 | 5.00 |
| Coconut oil | 29.50 | 20.00 | 0.00 | 20.00 | 0.00 |
| EPA-enriched oil 2 | 0.00 | 3.00 | 7.00 | 11.00 | 22.60 |
| DHA-enriched oil 3 | 1.50 | 2.50 | 4.00 | 5.20 | 9.00 |
| ARA-enriched oil 4 | 10.00 | 10.00 | 10.00 | 9.80 | 9.40 |
| Others 5 | 944.00 | 944.00 | 944.00 | 944.00 | 944.00 |
| *Proximate composition (% of dry weight)* | | | |  |  |
| Moisture | 7.77 | 7.66 | 7.69 | 7.60 | 7.79 |
| Crude protein | 41.97 | 41.07 | 41.12 | 41.80 | 41.91 |
| Crude lipid | 7.79 | 7.78 | 7.85 | 7.79 | 7.80 |
| n-3 HUFA levels | 0.50 | 0.73 | 1.04 | 1.42 | 2.57 |
| n-6 HUFA levels | 0.51 | 0.51 | 0.53 | 0.53 | 0.51 |
| *Dietary fatty atty acid composition (% total fatty acids)* | | | |  |  |
| 12:0 | 15.92 | 14.09 | 7.95 | 6.91 | 0.00 |
| 14:0 | 8.08 | 7.30 | 5.50 | 4.88 | 1.85 |
| 16:0 | 15.54 | 15.92 | 15.41 | 14.38 | 12.44 |
| 16:1n-9 | 1.82 | 1.90 | 1.89 | 1.90 | 1.83 |
| 18:0 | 5.60 | 5.65 | 5.76 | 5.07 | 4.18 |
| 18:1n-9 | 13.99 | 13.63 | 14.34 | 13.36 | 10.96 |
| 18:2n-6 | 16.07 | 15.99 | 15.81 | 16.08 | 15.18 |
| 18:3n-3 | 6.81 | 6.78 | 6.28 | 6.78 | 6.64 |
| 20:4n-6 (ARA) | 6.56 | 6.54 | 6.69 | 6.78 | 6.60 |
| 20:5n-3 (EPA) | 2.99 | 4.43 | 5.77 | 8.39 | 15.25 |
| 22:5n-3 (DPA) | 0.49 | 0.74 | 1.22 | 1.56 | 2.56 |
| 22:6n-3 (DHA) | 3.41 | 5.01 | 7.48 | 9.89 | 17.64 |
| ΣSFA 6 | 46.98 | 44.77 | 36.10 | 32.35 | 19.06 |
| ΣMUFA 7 | 15.81 | 15.53 | 16.23 | 15.26 | 12.79 |
| ΣPUFA 8 | 36.33 | 39.49 | 43.24 | 49.47 | 63.87 |
| Σn-6 PUFA | 22.63 | 22.53 | 22.50 | 22.87 | 21.78 |
| Σn-3 PUFA | 13.70 | 16.96 | 20.74 | 26.61 | 42.10 |
| Σn-3 HUFA 9 | 6.89 | 10.18 | 14.46 | 19.84 | 35.46 |

1 Vegetable oil mixture:the ratio of perilla oil to safflower oil is 2.0.

2 DHA-enriched oil: 78.89% DHA,15.64% DPA and other fatty acids, Xi'an Sheng he Biological Technology Co., Ltd., China.

3 EPA-enriched oil: 31.41% DHA, 57.24% EPA and other fatty acids, Xi'an Sheng he Biological Technology Co., Ltd., China.

4 ARA-enriched oil: 57.72% ARA, 11.13% 18:0, 8.13% 18:1n-9 and other fatty acids, Xi'an Sheng he Biological Technology Co., Ltd., China.

5 Included casein (300 mg g−1), soybean protein concentrate (180 mg g−1), α-starch (144 mg g−1), semi skimmed fish meal (100 mg g−1), krill meal (50 mg g−1), yeast extract (50 mg g−1), carboxymethyl cellulose (30 mg g−1), soybean lecithin (20 mg g−1), vitamin and mineral premixes (20 and 20 mg g−1, respectively), monocalcium phosphate (15 mg g−1), cholesterol (8 mg g−1) and choline chloride (7 mg g−1). The vitamin and mineral premixes were obtained from Guangzhou Hinter Bio-technology Co., Ltd., China.

6 SFA: Saturated fatty acids.

7 MUFA: Monounsaturated fatty acids.

8 PUFA: Polyunsaturated fatty acids.

9 HUFA: Highly unsaturated fatty acids.

**Table S2.** Primer used in this study.

| Names of primers | Sequence of primers (5’→3’) | Application | Reference |
| --- | --- | --- | --- |
| 5' GSP | TGGCATACCAAAGGACACTGGTCACC | 5’ RACE |  |
| 3' GSP | CTCTTCCCAGCTGTCTATCCTGTGGC | 3’ RACE |
| LITMUS-Fatp1-F | GGAAGATCTCCTTGGAGGTTCTTTAAC | Vector Construction |  |
| LITMUS-Fatp1-R | GAAAGGCCTAACTTCAGCACCACACAC |
| Q-Sp-18S-F | CAGACAAATCGCTCCACCAAC | qRT-PCR | [30] |
| Q-Sp-18S-R | GACTCAACACGGGGAACCTCA |
| Q-Sp-Acsl1-F | ATCAACCAGGCTTCCATCAC | qRT-PCR | [30] |
| Q-Sp-Acsl1-R | CATATGGTGCACAGGTCGTC |
| Q-Sp-Acsl3-F | ACCAGCTCAAAGAGACTCCC | qRT-PCR | [30] |
| Q-Sp-Acsl3-R | CCAATGACGCCACTGACAAG |
| Q-Sp-Acsl4-F | CACCGTATCACCGTATGCAC | qRT-PCR | [30] |
| Q-Sp-Acsl4-R | ATCCTCCATTACCACCACCG |
| Q-Sp-Fatp1-F | GCGTGTGGATTTGTGTCAGT | qRT-PCR | [30] |
| Q-Sp-Fatp1-R | GCCTTCTTGTCTGCATAGCC |
| Q-Sp-Fatp4-F | CCTCCTCAACATGCCAGAGA | qRT-PCR | [30] |
| Q-Sp-Fatp4-R | GAGCCACAGGATAGACAGCT |
| Q-Sp-Srebp1-F | TGCCTGGCCGTACTATACTG | qRT-PCR | [30] |
| Q-Sp-Srebp1-R | ACTGCCCCTTAGACAAGTCC |
| Q-Sp-Acc-F | GTAAGCCGAGTCAGGAAACCAC | qRT-PCR | [30] |
| Q-Sp-Acc-R | GACGACCCAACCCTAACAACC |
| Q-Sp-Fas-F | ACTCTGGAACGAGAGGCTGA | qRT-PCR | [30] |
| Q-Sp-Fas-R | ATGTTGGAGTCAGGGAGCAC |

**Table S3.** Fatty acid composition of muscle in crabs fed different dietary n-3 LC-PUFA levels.

| Fatty acid | Dietary n-3 LC-PUFA levels | | | | |
| --- | --- | --- | --- | --- | --- |
| 0.50 | 0.73 | 1.04 | 1.42 | 2.57 |
| *Polar lipids* | | | | | |
| 12:0 | 0.55 ± 0.02b | 0.57 ± 0.02b | 0.51 ± 0.01ab | 0.53 ± 0.003ab | 0.47 ± 0.03a |
| 14:0 | 0.81 ± 0.01ab | 0.82 ± 0.01b | 0.80 ± 0.01ab | 0.72 ± 0.04ab | 0.63 ± 0.09a |
| 16:0 | 16.49 ± 0.04 | 16.52 ± 0.09 | 16.49 ± 0.10 | 16.15 ± 0.18 | 16.18 ± 0.10 |
| 18:0 | 12.73 ± 0.10c | 10.21 ± 0.68b | 9.83 ± 0.35ab | 9.00 ± 0.35ab | 8.51 ± 0.28a |
| 16:1n-7 | 3.03 ± 0.03b | 2.67 ± 0.12ab | 2.72 ± 0.07ab | 2.58 ± 0.18a | 2.80 ± 0.04ab |
| 18:1n-9 | 10.90 ± 0.25 | 10.81 ± 0.13 | 10.58 ± 0.10 | 11.01 ± 0.05 | 11.35 ± 0.38 |
| 20:1n-9 | 5.24 ± 0.09ab | 4.89 ± 0.16a | 5.62 ± 0.04b | 5.56 ± 0.14ab | 5.62 ± 0.28b |
| 18:2n-6 | 13.84 ± 0.32c | 13.52 ± 0.08c | 11.97 ± 0.26b | 11.24 ± 0.05b | 10.29 ± 0.06a |
| 18:3n-3 | 2.36 ± 0.02 | 2.32 ± 0.02 | 2.32 ± 0.07 | 2.32 ± 0.03 | 2.19 ± 0.07 |
| 20:4n-6 | 4.09 ± 0.08 | 4.13 ± 0.08 | 4.11 ± 0.07 | 4.06 ± 0.02 | 4.20 ± 0.09 |
| 20:5n-3 | 14.95 ± 0.24a | 15.85 ± 0.26ab | 16.51 ± 0.26bc | 17.24 ± 0.26c | 18.53 ± 0.33d |
| 22:5n-3 | 0.41 ± 0.17 | 0.49 ± 0.20 | 0.56 ± 0.23 | 0.73 ± 0.30 | 0.83 ± 0.34 |
| 22:6n-3 | 9.15 ± 0.40a | 10.24 ± 0.24ab | 11.09 ± 0.15bc | 12.10 ± 0.39c | 14.95 ± 0.04d |
| ΣSFA 6 | 30.57 ± 0.10c | 28.12 ± 0.59b | 27.63 ± 0.40ab | 26.39 ± 0.56ab | 25.79 ± 0.48a |
| ΣMUFA 7 | 19.16 ± 0.27 | 18.36 ± 0.18 | 18.93 ± 0.06 | 19.14 ± 0.02 | 19.76 ± 0.69 |
| ΣPUFA 8 | 44.80 ± 0.83a | 46.55 ± 0.36ab | 46.56 ± 0.65ab | 47.69 ± 0.48b | 50.99 ± 0.26c |
| ΣHUFA 8 | 28.59 ± 0.56a | 30.71 ± 0.44b | 32.28 ± 0.34b | 34.13 ± 0.46c | 38.51 ± 0.25d |
| *Nonpolar lipids* | | | | | |
| 12:0 | 1.73 ± 0.07ab | 1.93 ± 0.06b | 1.86 ± 0.04ab | 1.42 ± 0.12a | 1.60 ± 0.21ab |
| 14:0 | 1.92 ± 0.22 | 1.68 ± 0.31 | 1.19 ± 0.04 | 1.23 ± 0.08 | 1.28 ± 0.10 |
| 16:0 | 20.00 ± 0.70 | 19.26 ± 0.79 | 19.28 ± 1.13 | 18.66 ± 1.44 | 18.10 ± 1.57 |
| 18:0 | 12.31 ± 0.34 | 13.01 ± 0.75 | 13.16 ± 0.20 | 13.01 ± 0.75 | 12.03 ± 0.66 |
| 20:0 | 3.45 ± 0.20 | 3.45 ± 0.20 | 3.45 ± 0.20 | 3.45 ± 0.20 | 3.45 ± 0.20 |
| 16:1n-7 | 2.38 ± 0.05 | 2.17 ± 0.15 | 2.09 ± 0.13 | 2.02 ± 0.02 | 2.12 ± 0.12 |
| 18:1n-9 | 26.40 ± 0.34 | 26.98 ± 0.46 | 26.45 ± 0.54 | 26.70 ± 0.56 | 26.52 ± 0.48 |
| 20:1n-9 | 0.58 ± 0.003 | 0.61 ± 0.01 | 0.60 ± 0.01 | 0.60 ± 0.01 | 0.61 ± 0.02 |
| 18:2n-6 | 12.40 ± 0.39a | 12.01 ± 0.32ab | 11.86 ± 0.13ab | 11.64 ± 0.03ab | 11.29 ± 0.07b |
| 18:3n-3 | 5.19 ± 0.05 | 5.03 ± 0.21 | 4.81 ± 0.41 | 4.75 ± 0.55 | 4.56 ± 0.47 |
| 20:4n-6 | 1.88 ± 0.04a | 1.74 ± 0.01b | 1.72 ± 0.02b | 1.81 ± 0.04ab | 1.82 ± 0.04ab |
| 20:5n-3 | 3.26 ± 0.04a | 3.69 ± 0.07b | 4.43 ± 0.02c | 5.39 ± 0.02d | 6.86 ± 0.02e |
| 22:6n-3 | 2.95 ± 0.01a | 3.29 ± 0.03b | 3.75 ± 0.01c | 4.34 ± 0.02d | 5.66 ± 0.11e |
| ΣSFA 1 | 35.96 ± 0.66a | 35.88 ± 0.36a | 35.49 ± 0.42a | 34.32 ± 0.50ab | 33.02 ± 0.62b |
| ΣMUFA 2 | 29.36 ± 0.30 | 29.76 ± 0.36 | 29.14 ± 0.42 | 29.32 ± 0.56 | 29.25 ± 0.60 |
| ΣPUFA 3 | 25.69 ± 0.35a | 25.77 ± 0.21a | 26.57 ± 0.28ab | 27.93 ± 0.58b | 30.20 ± 0.35c |
| ΣHUFA 4 | 8.10 ± 0.01a | 8.72 ± 0.10b | 9.90 ± 0.03c | 11.54 ± 0.02d | 14.34 ± 0.11e |

Data are presented as means ± S.E.M (n = 4).

1 SFA, saturated fatty acids. 2 MUFA, monounsaturated fatty acids. 3 PUFA, polyunsaturated fatty acids.

4 HUFA, highly unsaturated fatty acids.

**Table S4.** Fatty acid composition of hepatopancreases in crabs fed different dietary n-3 LC-PUFA levels.

| Fatty acid | Dietary n-3 LC-PUFA levels | | | | |
| --- | --- | --- | --- | --- | --- |
| 0.50 | 0.73 | 1.04 | 1.42 | 2.57 |
| *Polar lipids* | | | | | |
| 12:0 | 1.19 ± 0.12ab | 1.74 ± 0.43b | 1.88 ± 0.13b | 1.21 ± 0.04ab | 0.62 ± 0.04a |
| 14:0 | 2.14 ± 0.06a | 2.57 ± 0.37ab | 3.13 ± 0.17b | 2.38 ± 0.08ab | 2.06 ± 0.20a |
| 16:0 | 20.68 ± 0.89b | 20.01 ± 0.64ab | 19.60 ± 0.54ab | 19.21 ± 0.21ab | 17.90 ± 0.19a |
| 18:0 | 12.44 ± 0.48b | 11.06 ± 0.23a | 9.99 ± 0.21a | 9.84 ± 0.06a | 10.14 ± 0.35a |
| 20:0 | 0.40 ± 0.02a | 0.46 ± 0.04ab | 0.56 ± 0.03b | 0.57 ± 0.01b | 0.59 ± 0.05b |
| 16:1n-7 | 3.65 ± 0.19 | 3.68 ± 0.17 | 3.25 ± 0.18 | 3.05 ± 0.05 | 3.33 ± 0.36 |
| 18:1n-9 | 14.40 ± 0.34 | 14.08 ± 0.59 | 13.86 ± 0.54 | 14.53 ± 0.43 | 13.47 ± 0.23 |
| 20:1n-9 | 0.50 ± 0.09 | 0.69 ± 0.05 | 0.68 ± 0.08 | 0.63 ± 0.16 | 0.81 ± 0.62 |
| 18:2n-6 | 11.21 ± 0.23 | 11.53 ± 0.12 | 11.91 ± 0.06 | 11.51 ± 0.25 | 11.16 ± 0.34 |
| 18:3n-3 | 3.72 ± 0.15 | 3.40 ± 0.13 | 3.42 ± 0.24 | 3.31 ± 0.30 | 3.96 ± 0.16 |
| 20:4n-6 | 7.77 ± 0.14 | 7.26 ± 0.53 | 7.53 ± 0.31 | 7.33 ± 0.06 | 7.48 ± 0.13 |
| 20:5n-3 | 6.79 ± 0.72a | 7.84 ± 0.67ab | 8.60 ± 0.55abc | 9.37 ± 0.45bc | 10.91 ± 0.28c |
| 22:6n-3 | 6.45 ± 0.37a | 7.49 ± 0.51ab | 8.75 ± 0.52bc | 9.88 ± 0.32cd | 10.85 ± 0.23c |
| ΣSFA 6 | 36.85 ± 1.47b | 35.83 ± 1.25b | 35.16 ± 1.05ab | 33.20 ± 0.26ab | 31.32 ± 0.49a |
| ΣMUFA 7 | 18.54 ± 0.20 | 18.45 ± 0.59 | 17.78 ± 0.78 | 18.20 ± 0.54 | 17.61 ± 0.42 |
| ΣPUFA 8 | 35.94 ± 1.06a | 37.52 ± 1.65ab | 40.20 ± 1.63abc | 41.39 ± 0.37bc | 44.37 ± 0.75c |
| ΣHUFA 8 | 21.01 ± 1.19a | 22.59 ± 1.70ab | 24.87 ± 1.37abc | 26.57 ± 0.80bc | 29.24 ± 0.52c |
| *Nonpolar lipids* | | | | | |
| 12:0 | 3.14 ± 0.16c | 3.03 ± 0.20c | 2.74 ± 0.30c | 1.76 ± 0.07b | 0.51 ± 0.05a |
| 14:0 | 4.63 ± 0.14c | 4.37 ± 0.15c | 4.27 ± 0.32c | 3.30 ± 0.11b | 2.09 ± 0.13a |
| 16:0 | 20.65 ± 0.93 | 20.24 ± 0.83 | 20.27 ± 0.65 | 20.16 ± 0.67 | 19.93 ± 0.67 |
| 18:0 | 6.82 ± 0.14bc | 7.47 ± 0.31c | 6.31 ± 0.18ab | 6.15 ± 0.21ab | 5.65 ± 0.21a |
| 20:0 | 0.73 ± 0.02ab | 0.79 ± 0.03b | 0.69 ± 0.01a | 0.71 ± 0.03ab | 0.67 ± 0.02a |
| 16:1n-7 | 4.58 ± 0.09b | 3.99 ± 0.13ab | 3.98 ± 0.28ab | 3.56 ± 0.09b | 3.65 ± 0.25b |
| 18:1n-9 | 22.23 ± 1.13 | 21.70 ± 1.09 | 21.51 ± 1.47 | 23.50 ± 0.84 | 22.32 ± 0.80 |
| 20:1n-9 | 0.95 ± 0.02b | 0.56 ± 0.04a | 0.85 ± 0.02b | 0.87 ± 0.05b | 0.85 ± 0.05b |
| 18:2n-6 | 15.54 ± 0.48 | 14.95 ± 0.31 | 14.85 ± 0.29 | 15.27 ± 0.51 | 14.57 ± 0.60 |
| 18:3n-3 | 4.28 ± 0.06a | 5.07 ± 0.18b | 4.25 ± 0.12a | 4.24 ± 0.09a | 4.17 ± 0.13a |
| 20:4n-6 | 5.50 ± 0.08ab | 5.32 ± 0.11a | 5.56 ± 0.24ab | 6.16 ± 0.07bc | 6.04 ± 0.08c |
| 20:5n-3 | 3.06 ± 0.05a | 3.42 ± 0.08a | 3.97 ± 0.12b | 4.60 ± 0.13c | 5.68 ± 0.03d |
| 22:6n-3 | 3.14 ± 0.05a | 3.48 ± 0.05a | 4.04 ± 0.07b | 4.63 ± 0.08c | 5.51 ± 0.15d |
| ΣSFA 1 | 35.96 ± 1.03b | 35.90 ± 0.82b | 34.28 ± 1.46b | 32.07 ± 0.64ab | 28.85 ± 0.69a |
| ΣMUFA 2 | 27.76 ± 1.08 | 26.25 ± 0.99 | 26.34 ± 1.21 | 27.91 ± 0.80 | 26.83 ± 0.59 |
| ΣPUFA 3 | 31.52 ± 0.38a | 32.24 ± 0.33a | 32.67 ± 0.27a | 34.89 ± 0.38b | 35.97 ± 0.52b |
| ΣHUFA 4 | 11.70 ± 0.16a | 12.23 ± 0.19a | 13.56 ± 0.43b | 15.39 ± 0.24c | 17.23 ± 0.18d |

Data are presented as means ± S.E.M (n = 4).

1 SFA, saturated fatty acids. 2 MUFA, monounsaturated fatty acids. 3 PUFA, polyunsaturated fatty acids.

4 HUFA, highly unsaturated fatty acids.

**Table S5.** Fatty acid compositions (% total fatty acid) of hepatopancreas and muscle of mud crabs after knockdown of *fatp1*.

| Fatty acids |  | Hepatopancreas |  |  |  | Muscle |  |
| --- | --- | --- | --- | --- | --- | --- | --- |
| Negative control | *Fatp1*-dsRNA | *P* - value |  | Negative control | *Fatp1*-dsRNA | *P* - value |
| 12:0 | 3.45 ± 0.20 | 2.67 ± 0.23 | 0.044 |  | 1.04 ± 0.19 | 0.40 ± 0.03 | 0.027 |
| 14:0 | 4.40 ± 0.23 | 3.92 ± 0.42 | 0.352 |  | 2.24 ± 0.29 | 1.23 ± 0.04 | 0.028 |
| 16:0 | 15.97 ± 0.63 | 17.62 ± 1.88 | 0.436 |  | 17.83 ± 0.33 | 18.88 ± 0.81 | 0.296 |
| 18:0 | 5.63 ± 0.30 | 3.73 ± 0.94 | 0.103 |  | 10.89 ± 0.25 | 11.45 ± 0.43 | 0.319 |
| 16:1n-9 | 3.52 ± 0.28 | 4.24 ± 0.80 | 0.427 |  | 2.20 ± 0.26 | 2.26 ± 0.35 | 0.894 |
| 16:1n-7 | 0.67 ± 0.07 | 1.52 ± 0.37 | 0.066 |  | 0.89 ± 0.19 | 4.89 ± 1.17 | 0.028 |
| 18:1n-9 | 14.34 ± 0.31 | 14.70 ± 0.32 | 0.453 |  | 11.00 ± 0.54 | 10.39 ± 0.80 | 0.558 |
| 20:1n-9 | 0.85 ± 0.10 | 1.85 ± 0.34 | 0.030 |  | 0.55 ± 0.12 | 0.91 ± 0.06 | 0.054 |
| 18:2n-6 | 13.12 ± 0.58 | 13.28 ± 0.74 | 0.870 |  | 7.19 ± 0.74 | 6.50 ± 0.62 | 0.509 |
| 18:3n-3 | 4.32 ± 0.12 | 3.87 ± 0.14 | 0.051 |  | 1.59 ± 0.18 | 1.44 ± 0.28 | 0.679 |
| 20:4n-6 | 6.94 ± 0.24 | 6.68 ± 0.48 | 0.649 |  | 12.48 ± 0.94 | 10.81 ± 0.31 | 0.168 |
| 22:4n-6 | 0.45 ± 0.12 | 0.44 ± 0.03 | 0.948 |  | 1.06 ± 0.20 | 1.03 ± 0.23 | 0.919 |
| 20:5n-3 | 6.58 ± 0.27 | 6.08 ± 0.46 | 0.385 |  | 14.22 ± 0.19 | 11.97 ± 1.31 | 0.165 |
| 22:5n-3 | 1.40 ± 0.08 | 1.42 ± 0.06 | 0.866 |  | 1.35 ± 0.06 | 0.98 ± 0.14 | 0.071 |
| 22:6n-3 | 6.41 ± 0.34 | 6.27 ± 0.42 | 0.806 |  | 7.18 ± 0.40 | 5.98 ± 0.85 | 0.268 |
| ΣSFA1 | 29.44 ± 1.32 | 27.94 ± 1.60 | 0.496 |  | 31.99 ± 0.68 | 31.96 ± 1.29 | 0.985 |
| ΣMUFA2 | 19.39 ± 0.49 | 22.31 ± 1.04 | 0.044 |  | 14.64 ± 0.69 | 18.45 ± 0.95 | 0.032 |
| ΣPUFA3 | 39.21 ± 1.54 | 38.04 ± 1.59 | 0.615 |  | 45.07 ± 1.02 | 38.70 ± 3.14 | 0.126 |
| ΣHUFA4 | 21.78 ± 0.85 | 20.89 ± 1.27 | 0.584 |  | 36.28 ± 0.70 | 30.76 ± 2.57 | 0.107 |

Data are presented as means ± S.E.M (n = 4).

1 SFA, saturated fatty acids. 2 MUFA, monounsaturated fatty acids. 3 PUFA, polyunsaturated fatty acids.

4 HUFA, highly unsaturated fatty acids.
